# Supplementary material for: Concentration-Dependent Emission of Annealed Sol-Gel Layers Incorporated with Rhodamine 19 and 6G as the Route to Tunable High-Temperature Luminescent Materials
Source: Gels. 2022 Jun 28;8(7):408. doi: 10.3390/gels8070408 (PMC9319610; doi:10.3390/gels8070408)
Supplement: Supplementary file 1 [file gels-08-00408-s001.zip › gels-1771802-supplementary.pdf]

## Supplementary Materials

### Concentration dependent emission of sol-gel layers doped with Rhodamine 19 and 6G as the route to tunable luminescent materials

Maria Zdończyk, Bartłomiej Potaniec, Marta Fiedot-Toboła, Tomasz Baraniecki and Joanna Cybińska

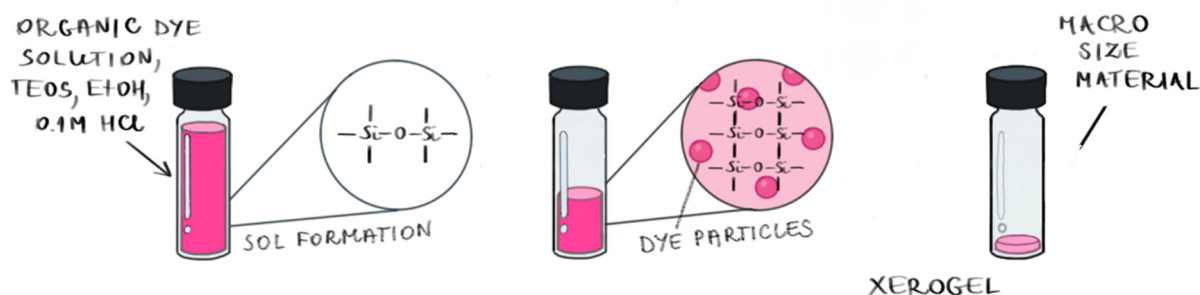

Figure S1. Illustrative scheme of sol-gel synthesis of gel doped with rhodamine dyes.

### S1. Spectroscopic analysis

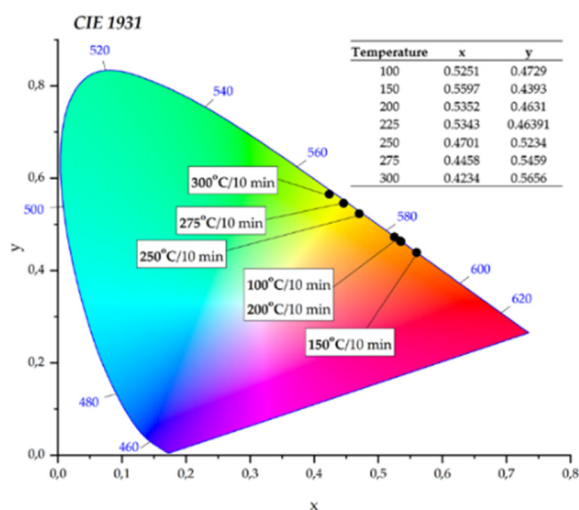

(a)

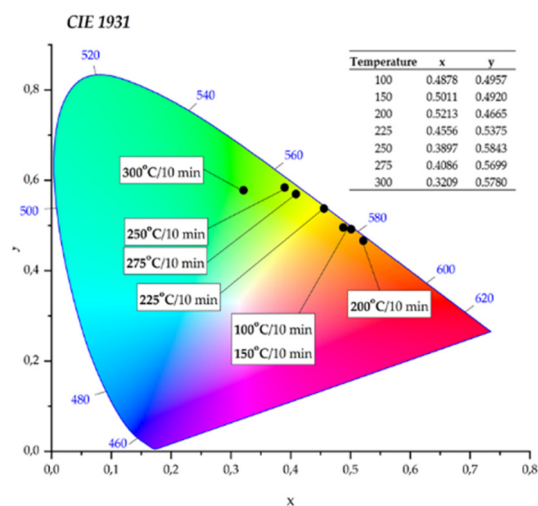

(b)

Figure S2. Chromacity diagram for SiO<sub>2</sub> doped with (a) Rh19; (b) Rh6G, after annealing.

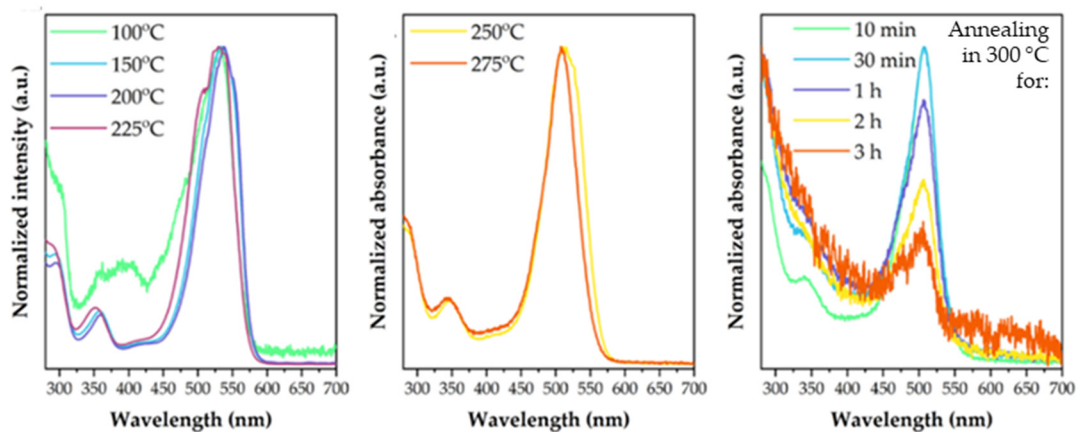

(a)

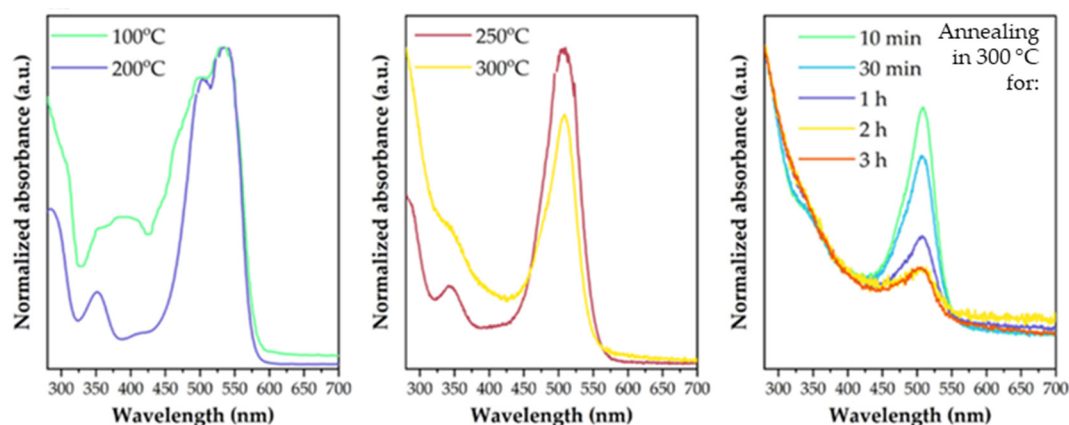

(b)

**Figure S3.** Absorption spectra recorded for different annealing temperatures for (a) SiO<sub>2</sub>:Rh19; (b) SiO<sub>2</sub>:Rh6G.

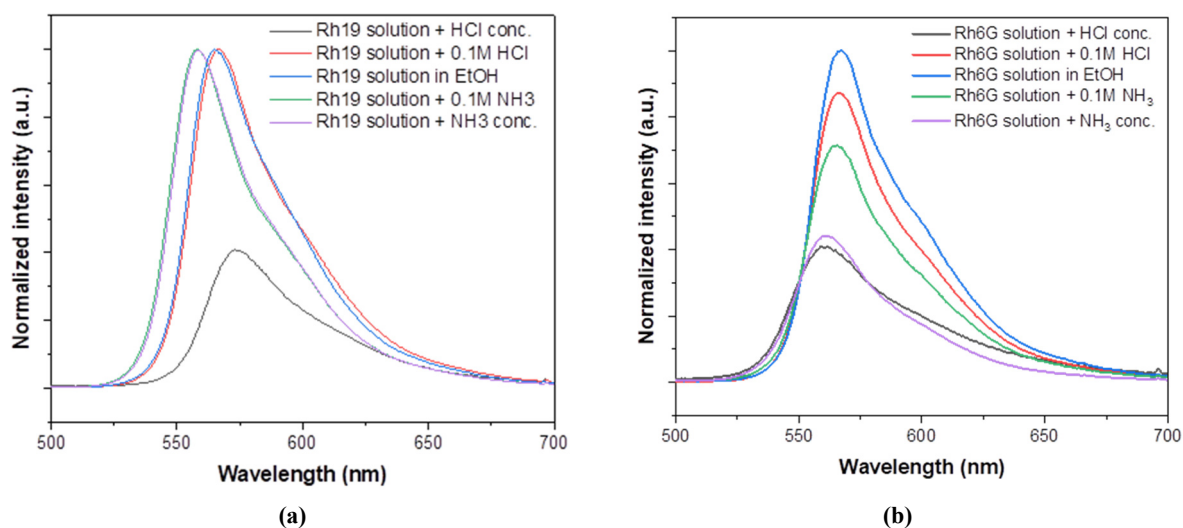

(a)

(b)

**Figure S4.** Emission spectra recorded for different pH for (a) Rh19; (b) Rh6G.

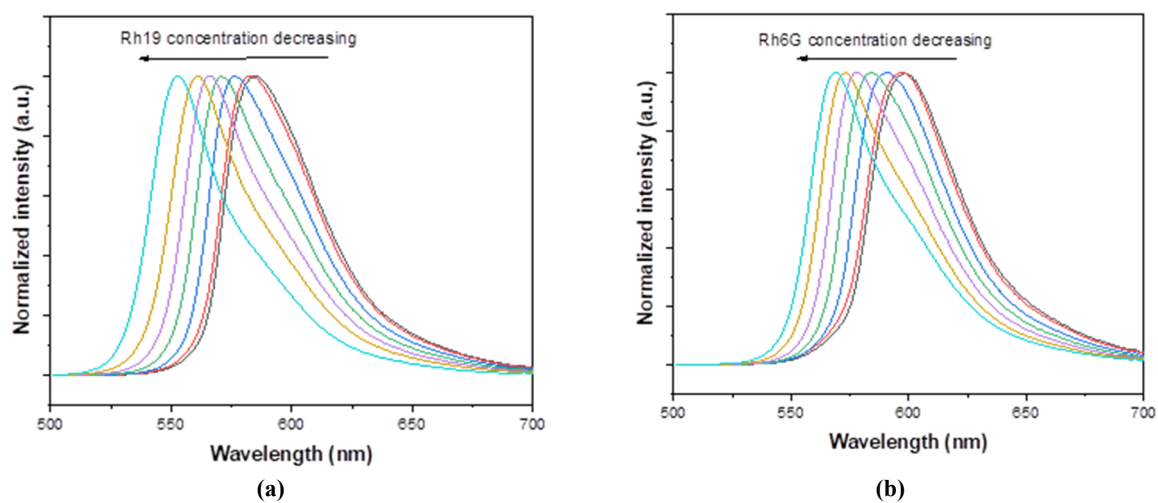

(a)

(b)

**Figure S5.** Emission spectra recorded for different concentrations for (a) Rh19; (b) Rh6G.

## S2. Thermal analysis

**Table S1.** List of temperatures of the maximum rate of degradation.

| Sample                  | DTG <sub>1</sub><br>[°C] | DTG <sub>2</sub><br>[°C] | DTG <sub>3</sub><br>[°C] | DTG <sub>4</sub><br>[°C] | DTG <sub>5</sub><br>[°C] |
|-------------------------|--------------------------|--------------------------|--------------------------|--------------------------|--------------------------|
| SiO <sub>2</sub> : Rh19 | -                        | 100                      | 164                      | 226                      | 546                      |
| SiO <sub>2</sub> : Rh6G | -                        | 100                      | 166                      | 245                      | 514                      |

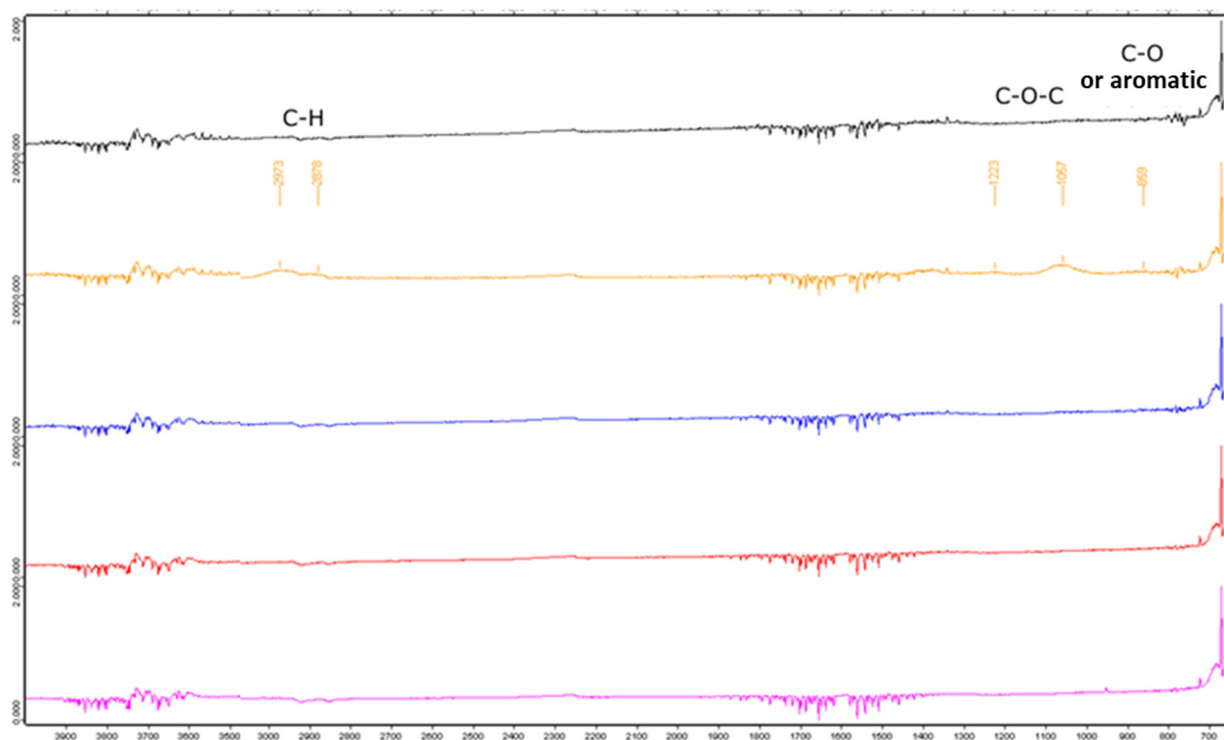

**Figure S6.** FTIR results of the SiO<sub>2</sub> : Rh6G sample: 100 °C, 170 °C, 240 °C, 350 °C, 518 °C.

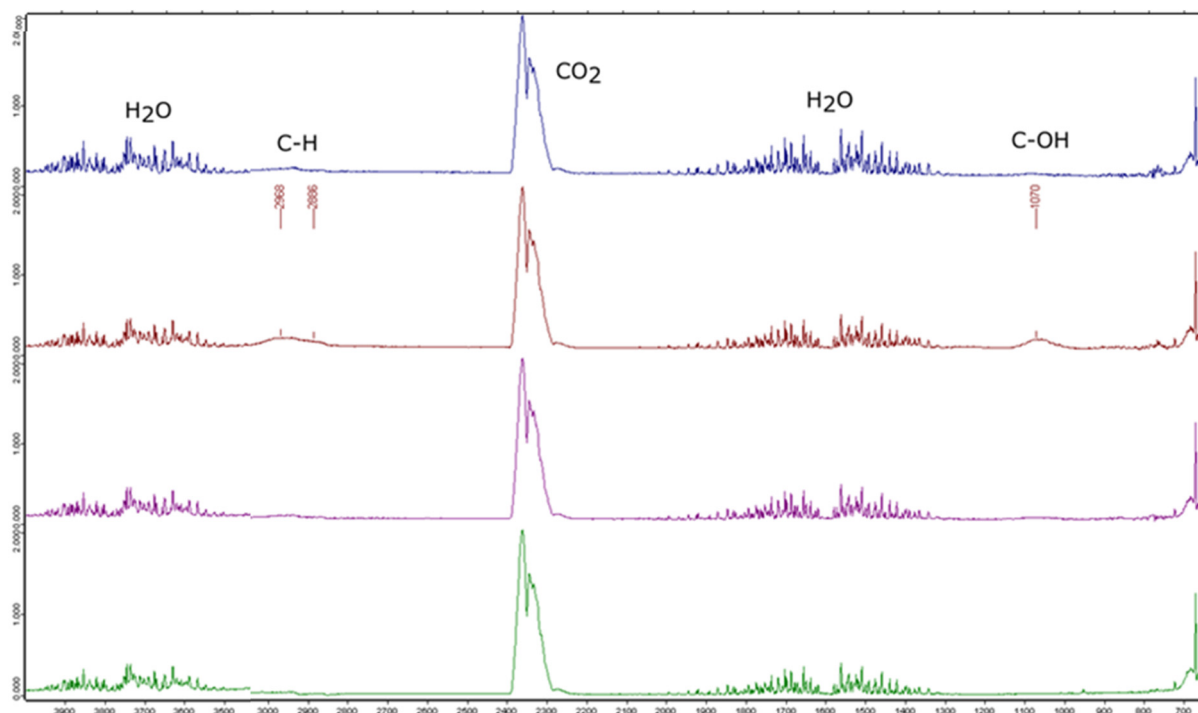

**Figure S7.** FTIR results of the SiO<sub>2</sub> : Rh19 sample: 100 °C, 170 °C, 225 °C, 545 °C.

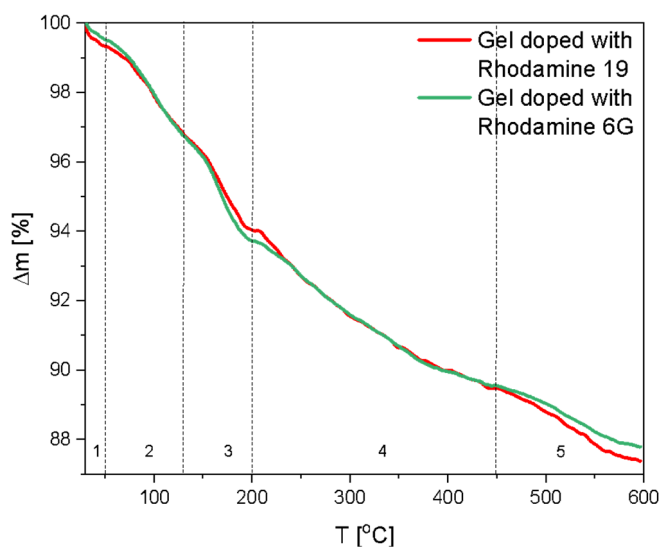

**a)**

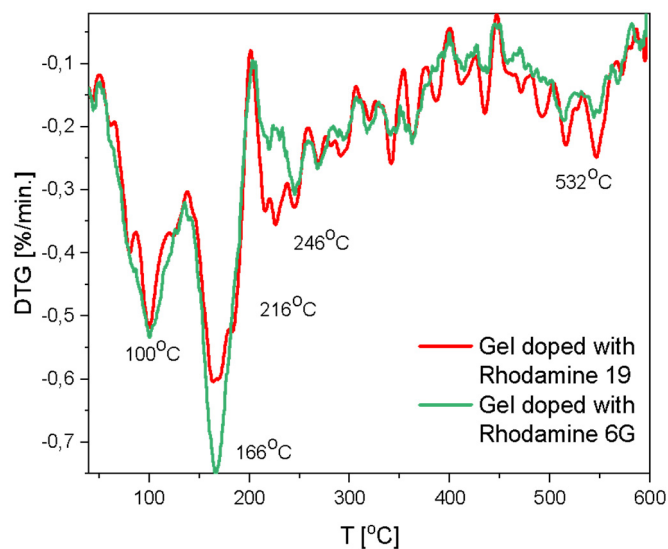

**(b)**

**Figure S8.** Results of thermogravimetric analyzes: **(a)** weight loss graphs, **(b)** first derivative of weight loss graphs. With green color gel doped with Rhodamine 6G is marked, while with red – Rhodamine 19.
